# Supplementary material for: Antibiotics Treatment Modulates Microglia-Synapses Interaction Through CX3CL1/CX3CR1 Axis
Source: Preprints.org preprint supplement (doi:10.20944/preprints202108.0225.v1), 2021-08-10
Supplement: Supplementary file 1 [file supplementary]

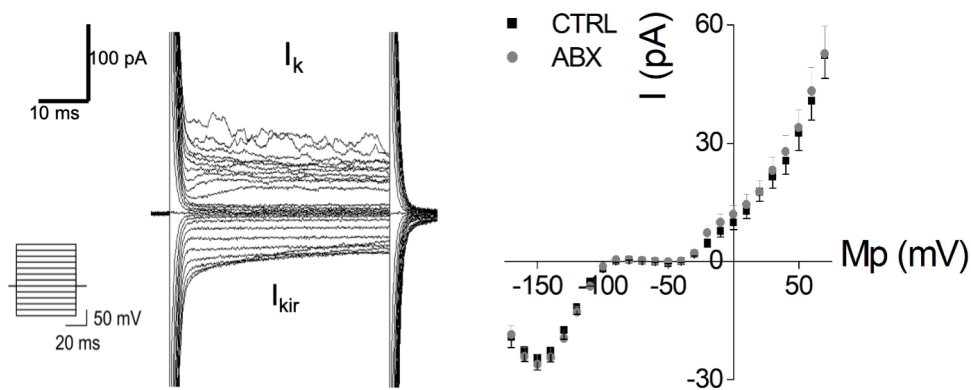

**Supplementary Figure 1:** Current traces of representative microglia cells from *CX3CR1<sup>+/GFP</sup>* mice acute hippocampal slices expressing both *I<sub>k</sub>* and *I<sub>kir</sub>* in response to voltage steps stimulation (steps from -170 to +70 mV; holding potential -70 mV). Right: Corresponding current/voltage relationship between microglia cells from CTRL (*n*= 40 cells/6 mice) and ABX (*n*= 47 cells/ 7 mice). *p*=0.44 and *p*=0.33, Student's *T*-test at 0 mV and 10 mV.

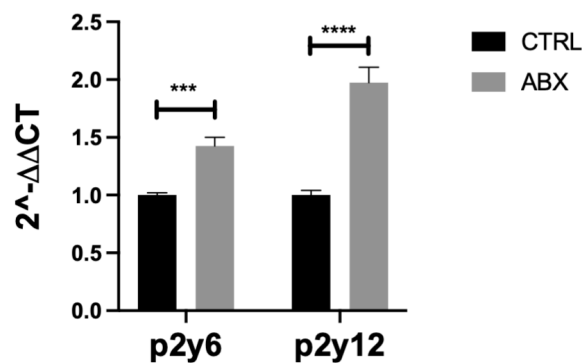

**Supplementary Figure 2:** RT-PCR of hippocampal extracts from CTRL and ABX mice, *p2y6* and *p2y12* purinoceptor genes in hippocampal RNA extract (CTRL *n*= 6 mice; ABX *n*= 6 mice. Student's *T*-test: \*\*\* *p*<0.001 \*\*\*\**p*<0.0001, ns: *p*=0.2)
